# Supplementary material for: Scavenger receptor collectin placenta 1 is a novel receptor involved in the uptake of myelin by phagocytes
Source: PubMed Central journal article supplement (PMC5357964; doi:10.1038/srep44794), 2017-03-20
Supplement: srep44794-s1.pdf [file srep44794-s1.pdf]

1 **Supplementary figures**

2

3 **Scavenger receptor collectin placenta 1 is a novel receptor involved in the uptake of**  
4 **myelin by phagocytes**

5 Jeroen Bogie<sup>1,+</sup>, Jo Mailleux<sup>1,+</sup>, Elien Wouters<sup>1</sup>, Winde Jorissen<sup>1</sup>, Elien Grajchen<sup>1</sup>, Jasmine  
6 Vanmol<sup>1</sup>, Kristiaan Wouters<sup>2,3</sup>, Niels Hellings<sup>1</sup>, Jack Van Horsen<sup>4</sup>, Tim Vanmierlo<sup>1</sup>, Jerome  
7 Hendriks<sup>1\*</sup>

8

9 <sup>1</sup> Biomedical Research Institute, Hasselt University / Transnational University Limburg,  
10 School of Life Sciences, Diepenbeek, Belgium

11 <sup>2</sup> Cardiovascular Research Institute Maastricht (CARIM), Maastricht University Medical  
12 Centre (MUMC), Maastricht, The Netherlands

13 <sup>3</sup> Department of Internal Medicine, Maastricht University Medical Centre (MUMC),  
14 Maastricht, The Netherlands

15 <sup>4</sup> Department of Molecular Cell Biology and Immunology, VU University Medical Center,  
16 Amsterdam, The Netherlands

17

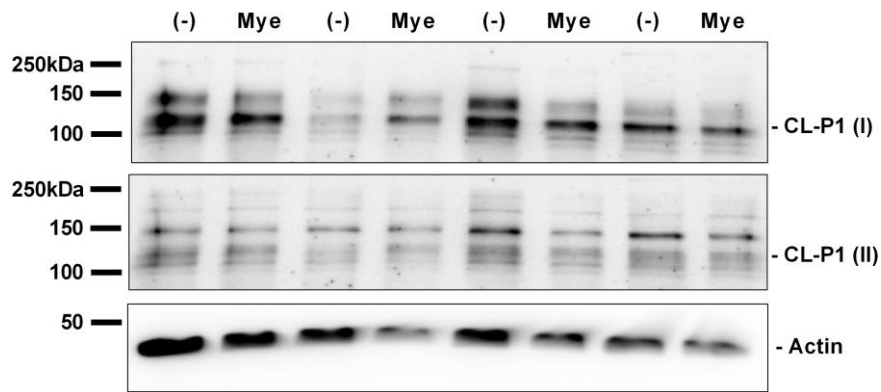

18

19 **Figure s1: Myelin uptake increases the expression of CL-P1 in human monocytes (raw**  
20 **data).** Human monocytes (hMono, n=5), were cultured with or without 100 µg/ml myelin for  
21 24h. Western blot analysis was used to define CL-P1 expression. Two antibodies were used to  
22 define CL-P1 expression.

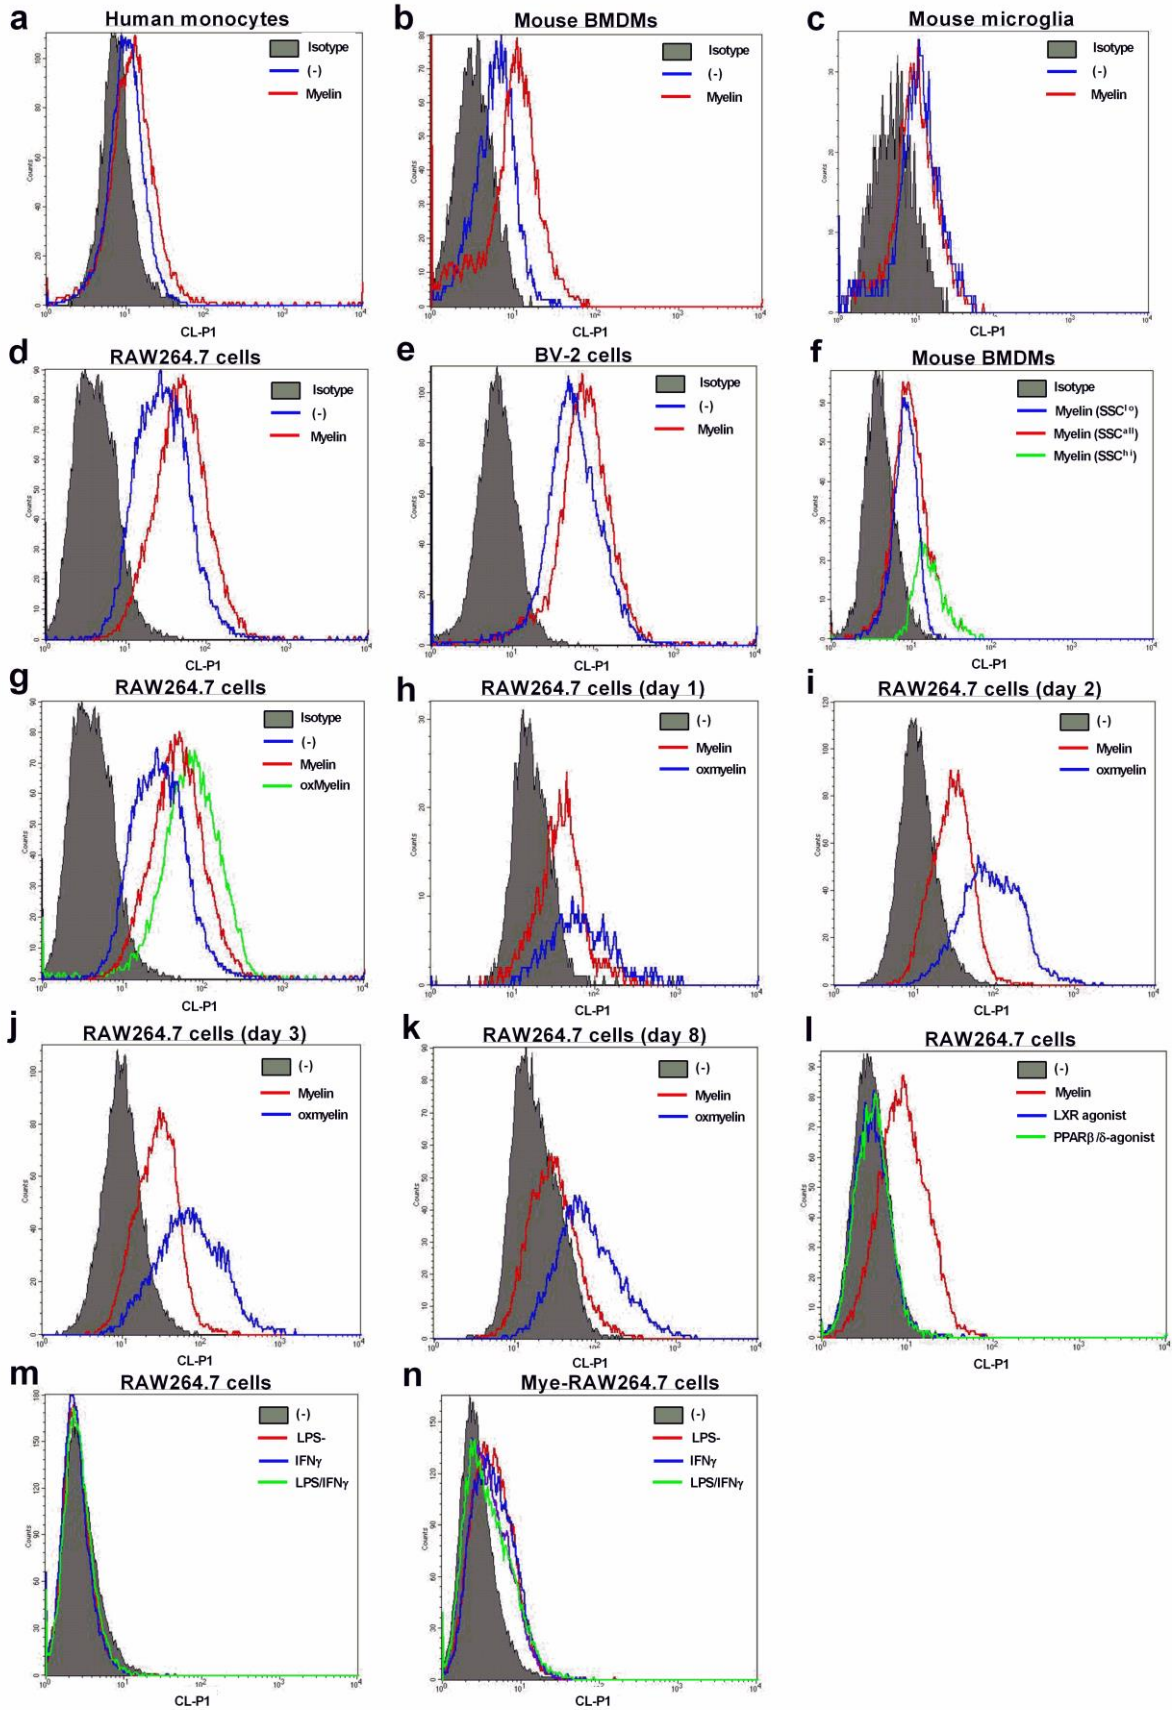

24 **Figure s2: Myelin uptake increases the surface expression of CL-P1 on myeloid cells**  
25 **(raw data).** (a-e) Primary human monocytes (a), primary mouse BMDMs (b) and microglia  
26 (c), RAW264.7 cells (d), and BV-2 cells (e) were cultured with or without 100 µg/ml myelin  
27 for 24h, after which CL-P1 expression was determined with flow cytometry. (f) Mouse  
28 BMDMs cultured with 100 µg/ml myelin for 24h. CL-P1 expression was determined in high  
29 granular (SSC<sup>hi</sup>), low granular (SSC<sup>lo</sup>), and all cells (SSC<sup>all</sup>) by using flow cytometry. (g)  
30 RAW264.7 cells were exposed to 100 µg/ml unmodified and CU<sup>2</sup>-oxidized myelin for 24h,  
31 after which CL-P1 expression was determined. (h-k) RAW264.7 cells were cultured with 100  
32 µg/ml unmodified or CU<sup>2</sup>-oxidized myelin or left untreated for 1 (h), 2 (i), 3 (j), and 8 days  
33 (k). CL-P1 expression was determined by using flow cytometry. (l) RAW264.7 cells were  
34 cultured with a 1 µM T0901317 (LXR agonist), 1 µM GW501516 (PPARβ/δ agonist), or 100  
35 µg/ml myelin for 24h, after which CL-P1 expression was determined with flow cytometry.  
36 (m,n) Untreated (m) or myelin treated RAW264.7 cells (n) were exposed to 500 U/ml IFNγ,  
37 100 ng/ml LPS, a combination 500 U/ml IFNγ and 100 ng/ml LPS, or left untreated. CL-P1  
38 expression was determined by using flow cytometry.

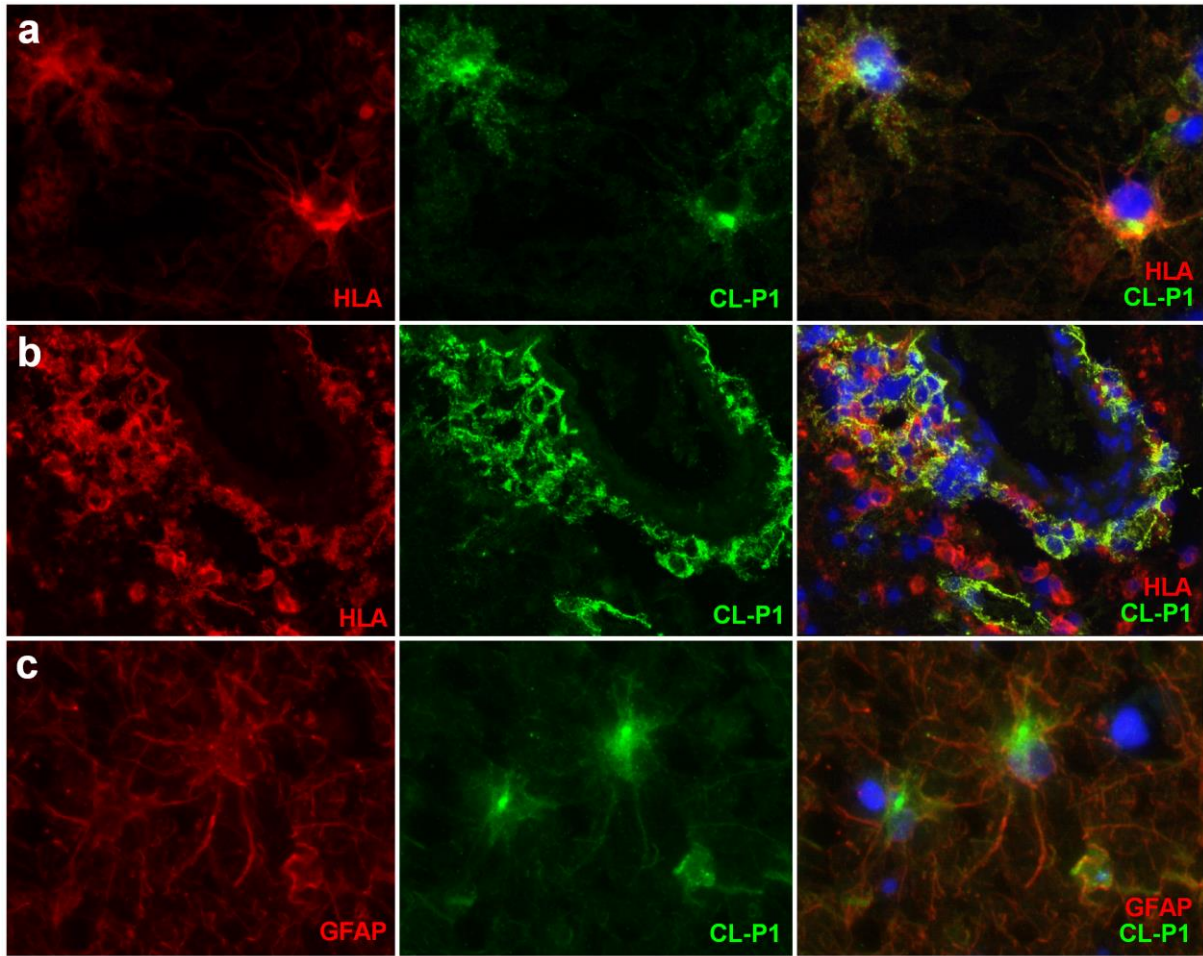

39

40 **Figure s3: CL-P1 is expressed by phagocytes and astrocytes in MS lesions.** (a-c)  
41 Representative images of active MS lesion stained for CL-P1 (R&D) and HLA-DR (a, 100x  
42 magnification; b, 40x magnification), and CL-P1 (R&D) and GFAP (c, 100x magnification).

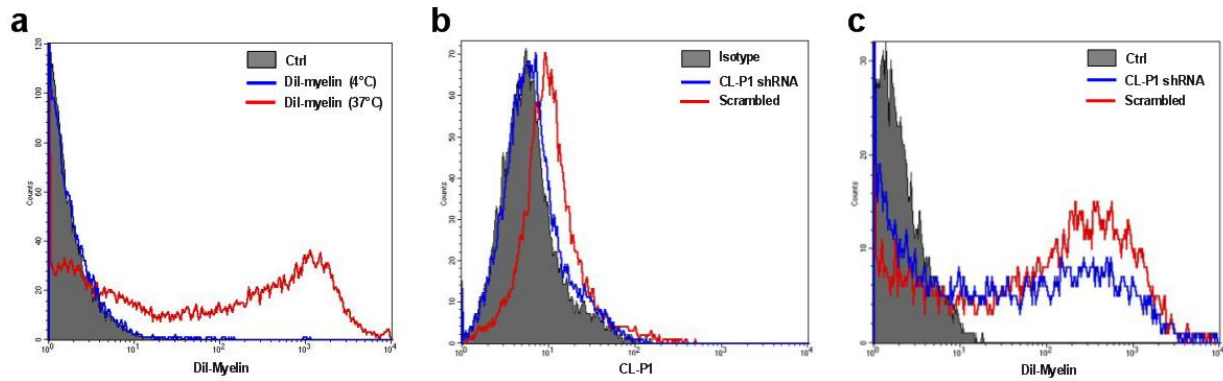

43

44 **Figure s4: CL-P1 is involved in the uptake of myelin (raw data).** (a) HEK293.1 cells were  
 45 exposed to DiI-labeled myelin for 1.5h (n=4). Myelin uptake was assessed using flow  
 46 cytometry. Cells were exposed to myelin at 4°C (binding) or 37°C (binding and uptake). (b)  
 47 HEK293.1 cells were exposed to scrambled shRNA or a pool of shRNA directed against CL-  
 48 P1 (shRNA1-4) for 48h. The mRNA and protein expression of CL-P1 was determined using  
 49 flow cytometry. (c) HEK293.1 cells were exposed to scrambled shRNA or a pool of shRNA  
 50 directed against CL-P1 (shRNA1-4) for 48h. Next, DiI-labeled myelin was added for 1.5h.  
 51 Flow cytometry was used to define myelin uptake.

52

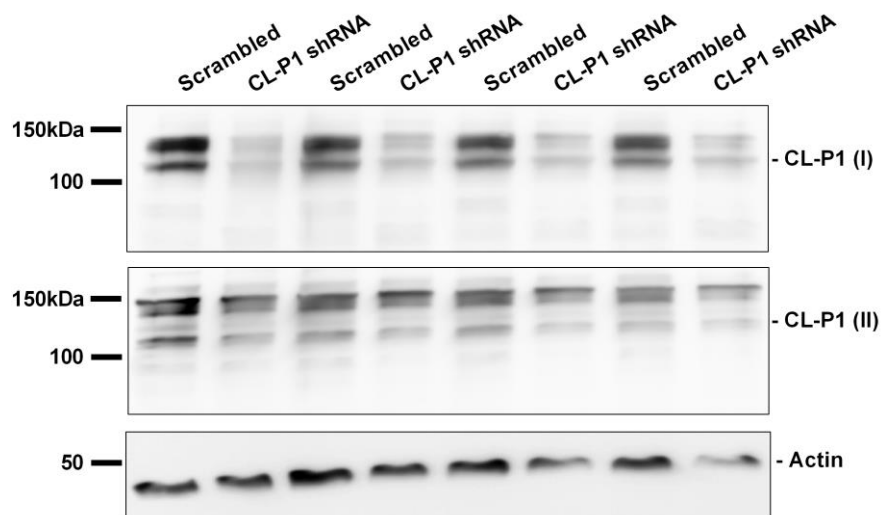

53

54 **Figure s5: CL-P1 is involved in the uptake of myelin (raw data).** HEK293.1 cells were  
 55 exposed to scrambled shRNA or a pool of shRNA directed against CL-P1 (shRNA1-4) for  
 56 48h. The protein expression of CL-P1 was determined using western blot. Two antibodies  
 57 were used to define CL-P1 expression.
